# Supplementary material
Source: PubMed Central journal article supplement (PMC5283952)
Supplement: NIHMS800502-supplement-Supplemental_Material.pdf [file NIHMS800502-supplement-Supplemental_Material.pdf]

## Supplemental Material

### New functional tools for anti-thrombogenic activity assessment of live surface glycocalyx

#### Authors

Sashka Dimitrievska<sup>1,2</sup>, Liqiong Gui<sup>3</sup>, Amanda Weyers<sup>4</sup>, Tylee Lin<sup>1</sup>, Chao Cai<sup>4</sup>, Wei Woo<sup>1,5</sup>, Charles T. Tuggle<sup>5</sup>, Sumati Sundaram<sup>3</sup>, Jenna L Balestrini<sup>3</sup>, David Slattery<sup>6</sup>, Lise Tchouta<sup>7</sup>, Themis R. Kyriakides<sup>1,8</sup>, John M. Tarbell<sup>9</sup>, Robert J. Linhardt<sup>2</sup>, Laura E. Niklason<sup>1,3</sup>

<sup>1</sup>Department of Biomedical Engineering, Yale University, New Haven, CT, USA;

<sup>2</sup>Howard Hughes Medical Institute, Chevy Chase, MD, USA; <sup>3</sup>Department of Anesthesiology, Yale University, New Haven, CT, USA; <sup>4</sup>Department of Chemical and Biological Engineering, Rensselaer Polytechnic Institute, Troy, NY, USA; <sup>5</sup>Department of Surgery, Yale University, New Haven, CT, USA; <sup>6</sup>Department of Biomedical Engineering, University of Connecticut, Storrs, CT, USA; <sup>7</sup>Department of Medicine, Yale University, New Haven, CT, USA; <sup>8</sup>Department of Pharmacology, Yale University, New Haven, CT, USA; <sup>9</sup>Department of Biomedical Engineering, The City College of New York, NY, USA

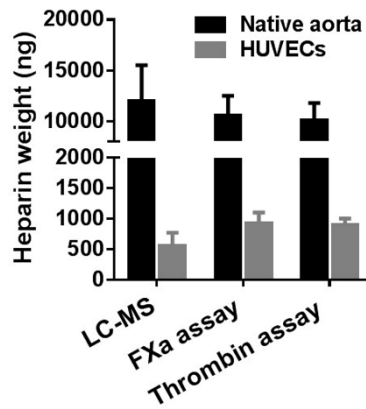

**Supplemental Figure I. Comparison between different assays for detecting heparin weight on live surfaces.** Total weight of heparin equivalent per cm<sup>2</sup> live surfaces (native aorta and HUVEC monolayer) was measured by LC-MS, FXa assay and thrombin assay. The results are mean of five independent assays using five different rats and HUVEC cultures (n=5).

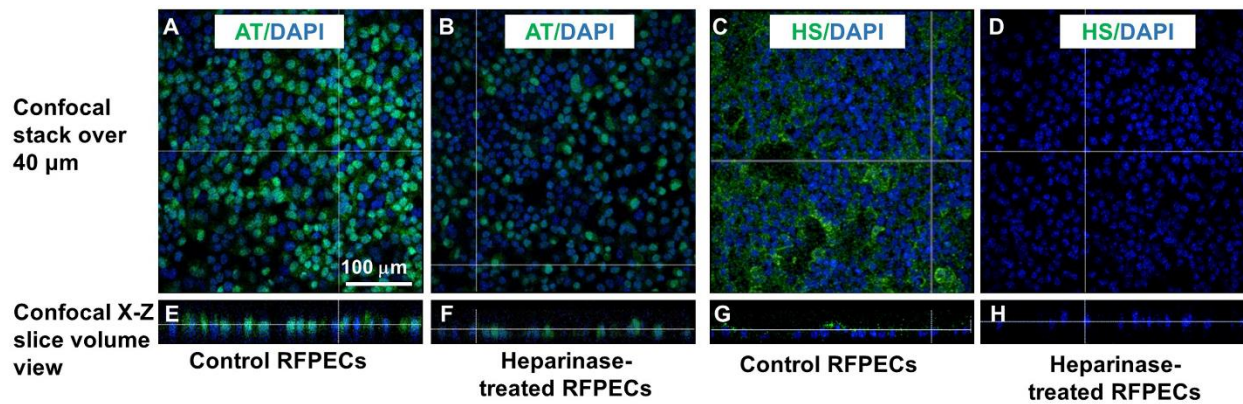

**Supplemental Figure II: Confocal images of the glyocalyx layer on rat fat pad endothelial cell (RFPEC) monolayer.** (A, B, E, F) HS is visualized by fluorescein-labeled AT (green). (C, D, G, H) HS is visualized by anti-HS antibody (green). Also shown is DAPI costaining (blue). The X-Z plane side view showing the depth of the glyocalyx in RFPEC monolayer (E, G) and heparinase-treated RFPECs (G, H).

**Supplemental Table I. Calculation of inactivated FXa using heparin standard**

| <b>Heparin weight (ng)</b> | <b>Absorbance at 16 min</b> | <b>Residual FXa (Unit)</b> | <b>Inactivated FXa (Unit)</b> |
|----------------------------|-----------------------------|----------------------------|-------------------------------|
| 0                          | <b>0.3</b>                  | 2                          | <b>0</b>                      |
| 10                         | <b>0.21</b>                 | 1.4                        | <b>0.6</b>                    |
| 100                        | <b>0.18</b>                 | 1.2                        | <b>0.8</b>                    |
| 1000                       | <b>0.14</b>                 | 0.93                       | <b>1.07</b>                   |
| 10 000                     | <b>0.04</b>                 | 0.25                       | <b>1.75</b>                   |

Absorbance from FXa assay using heparin standard shown in Figure 1A

**Supplemental Table II. Calculation of inactivated thrombin using heparin standard**

| <b>Heparin weight (ng)</b> | <b>Absorbance at 11 min</b> | <b>Residual thrombin (Unit)</b> | <b>Inactivated thrombin (Unit)</b> |
|----------------------------|-----------------------------|---------------------------------|------------------------------------|
| 0                          | <b>0.15</b>                 | 0.5                             | <b>0</b>                           |
| 10                         | <b>0.13</b>                 | 0.42                            | <b>0.08</b>                        |
| 100                        | <b>0.09</b>                 | 0.29                            | <b>0.21</b>                        |
| 1000                       | <b>0.07</b>                 | 0.23                            | <b>0.27</b>                        |
| 10 000                     | <b>0.05</b>                 | 0.19                            | <b>0.31</b>                        |

Absorbance from thrombin assay using heparin standard shown in Figure 2A
